# Supplementary material for: Development of carrier-free nanodrugs based on low molecular weight heparin–doxorubicin conjugate assembly with smart pH-triggered drug release characteristics for combinatorial antitumor therapy
Source: Royal Society of Chemistry journal article supplement (doi:10.1039/d1nj04224f), 2021-12-02
Supplement: d1nj04224f1.pdf [file d1nj04224f1.pdf]

## Supporting information

### **Development of carrier-free nanodrugs based on low molecular heparin-doxorubicin conjugate assembly with smart pH-triggered drug release characteristics for combinatorial antitumor therapy**

Bo Fan<sup>1,2#</sup>, Qian Li<sup>1,#</sup>, Yanping Jiang<sup>1,#</sup>, Weiguang Shen<sup>1</sup>, Yang Xing<sup>1</sup>, Guixian Liang<sup>1</sup>, Qian Wu<sup>1</sup>, Shurong Ban<sup>1,\*</sup>, Ruiping Zhang<sup>2,\*</sup>

1 Department of Pharmacy, Shanxi Medical University, Taiyuan 030001, Shanxi, People's Republic of China

2 The Radiology Department of Third Hospital of Shanxi Medical University, Shanxi Bethune Hospital, Shanxi Academy of Medical Sciences; Tongji Shanxi Hospital, Tongji Medical College, Huazhong University of Science and Technology, Taiyuan, 030032, China

<sup>#</sup> These authors contributed equally to this work

Correspondence: Shurong Ban

Email: shurongban@sxmu.edu.cn

Correspondence: Ruiping Zhang

Email: zrp\_7142@sxmu.edu.cn

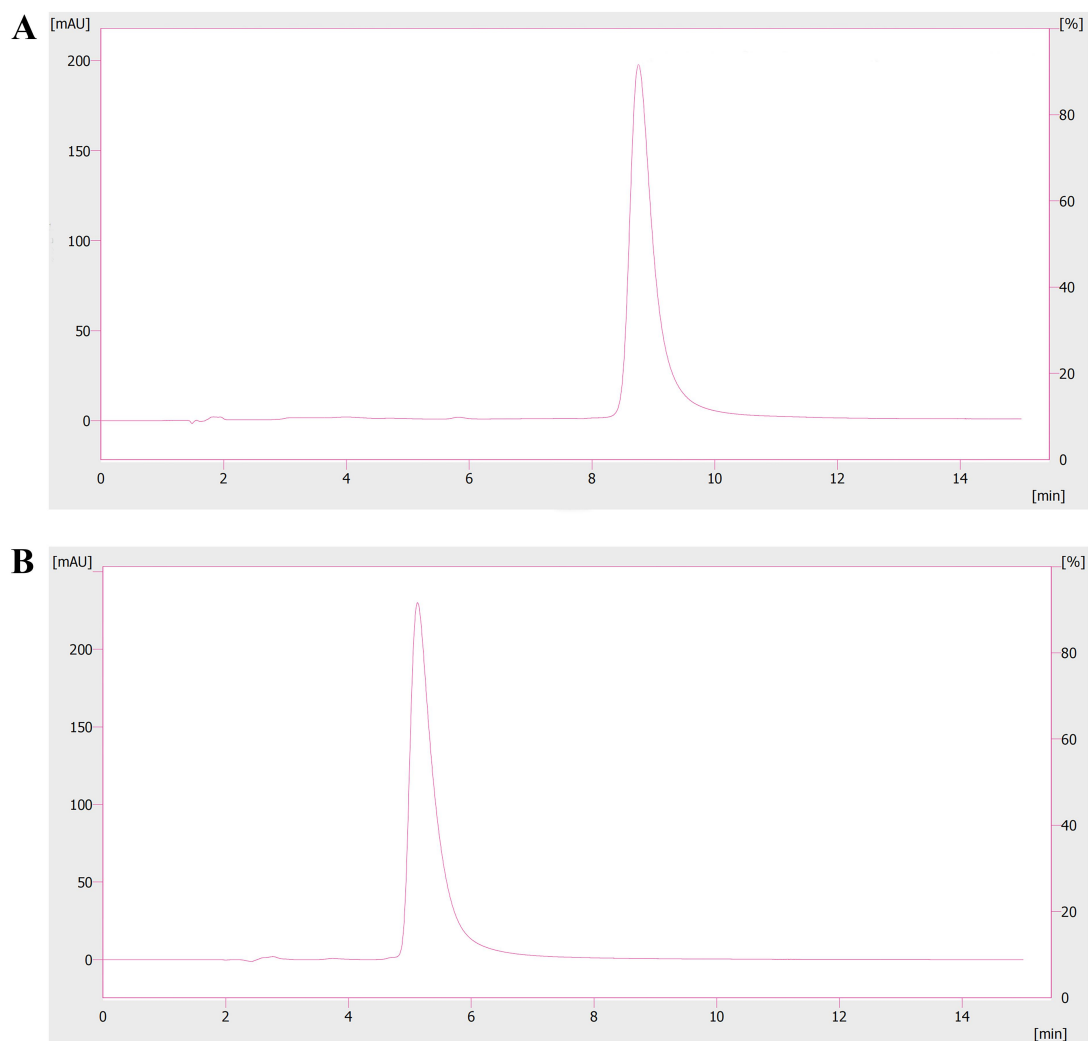

Fig. S1 Chromatogram of DOX (A) and LMWH-DOX conjugate (B) with reversed-phase HPLC analysis. The determination was performed on Diamonsil C<sub>18</sub> column (250 mm × 4.6 mm, 5 μm) with a mobile phase of water/methanol (30:70, v/v) at a flow rate of 1.0 mL/min, column temperature of 25 °C and detection wavelength of 233 nm.

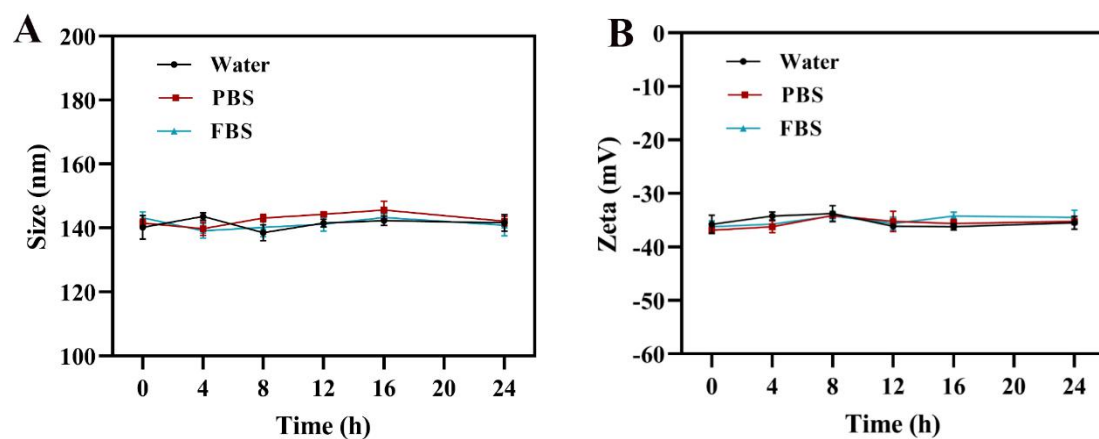

Fig. S2. Stability study on size (A) and zeta potential (B) of LD NDs in water, PBS and FBS over 24 hours.

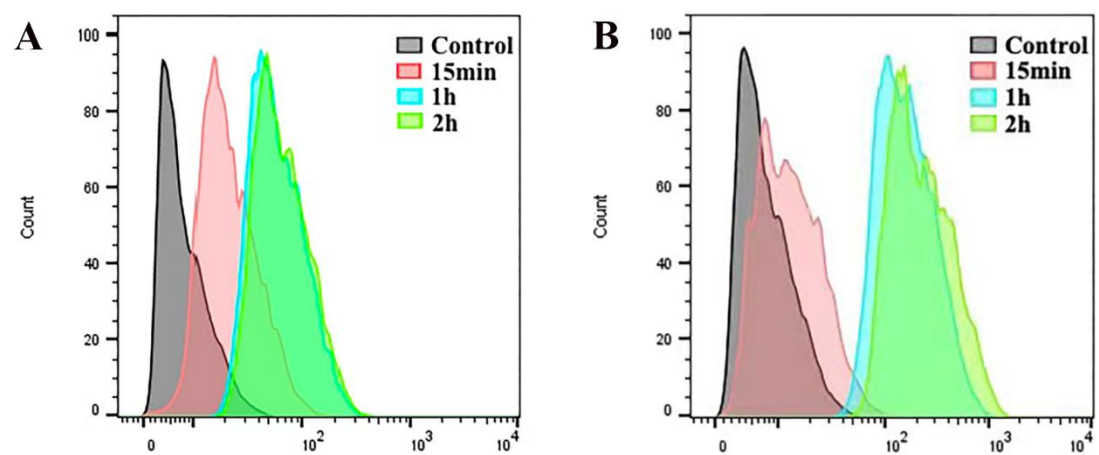

Fig. S3 Flow cytometry analysis for free DOX (A) and LD NDs (B) on 4T1 cells after 15min, 1 h and 2 h incubation.

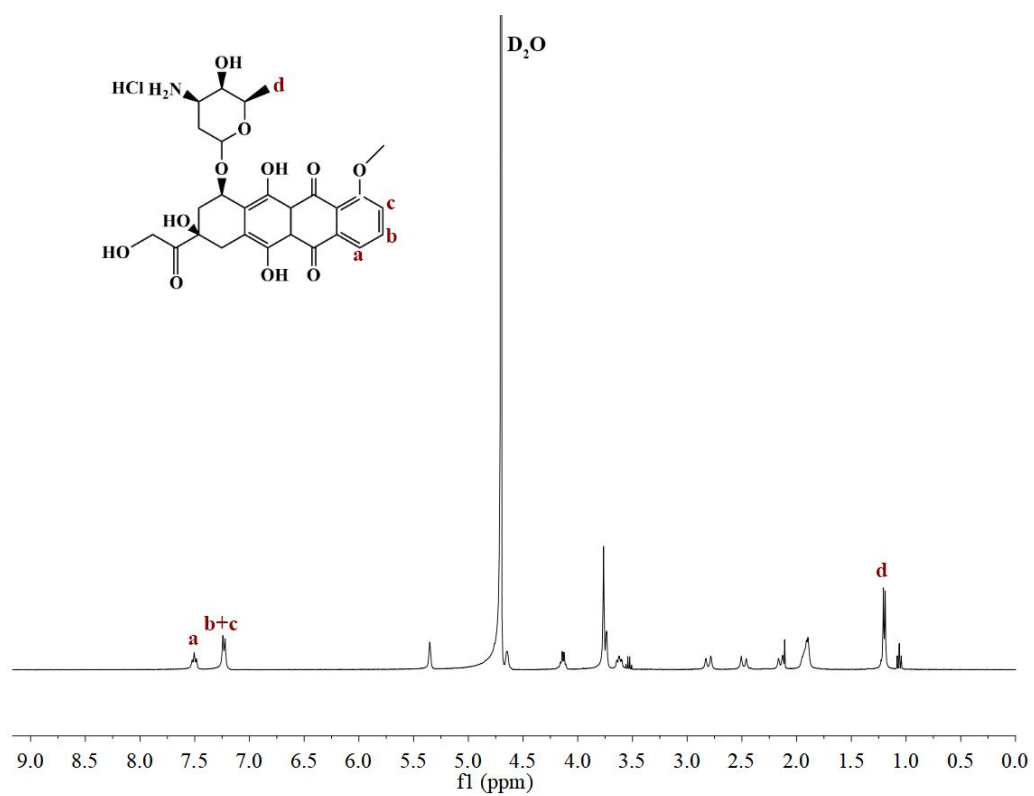

Fig. S4 <sup>1</sup>H NMR spectra of DOX.

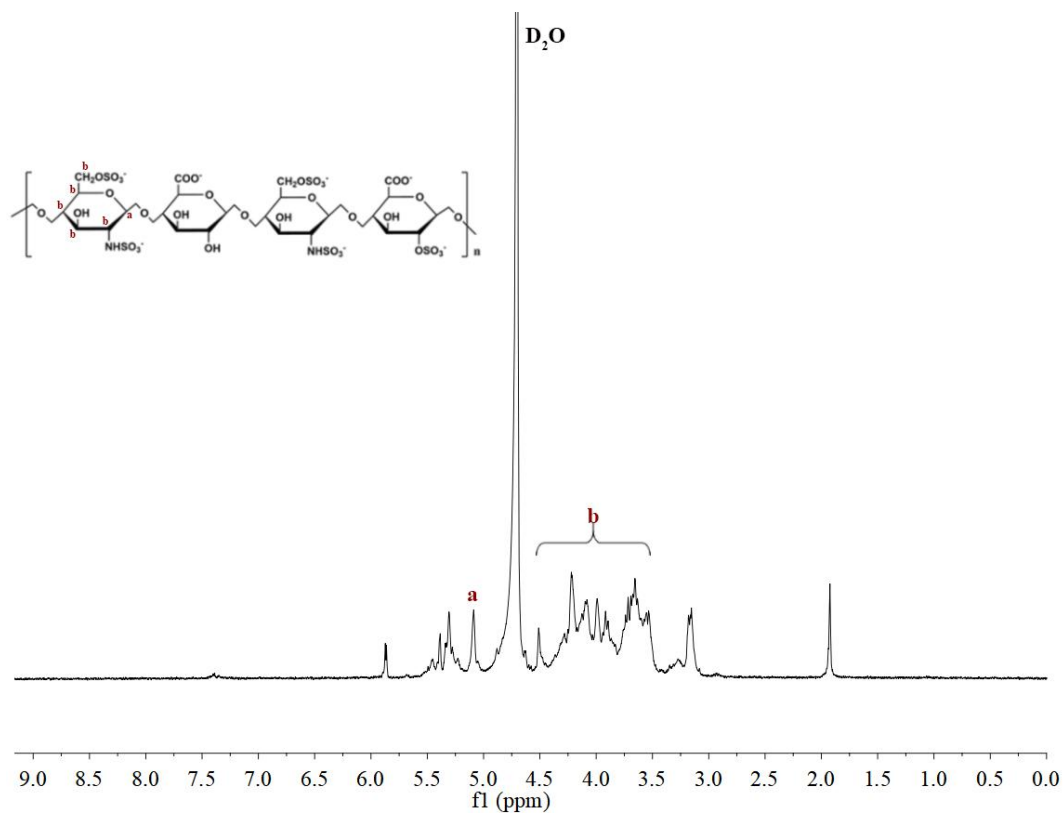

Fig. S5 <sup>1</sup>H NMR spectra of LMWH. (a) LMWH backbone C1 proton; (b) LMWH backbone C2-C6 proton.

Table S1. Combination indexes of DOX with LMWH on 4T1 cells

| DOX (µg/ml) | LMWH (µg/ml) | CI <sup>a</sup> |
|-------------|--------------|-----------------|
| 0.57        | 4.178        | 0.581           |
| 5.7         | 41.78        | 0.748           |
| 14.14       | 103.6        | 0.600           |

<sup>a</sup> CI means the Combination index and is calculated by CalcuSyn software based on Chou-Talalay method.
